# Supplementary material
Source: PubMed Central journal article supplement (PMC3258354)

**p53<sup>-/-</sup>**

**p53<sup>+/+</sup>**

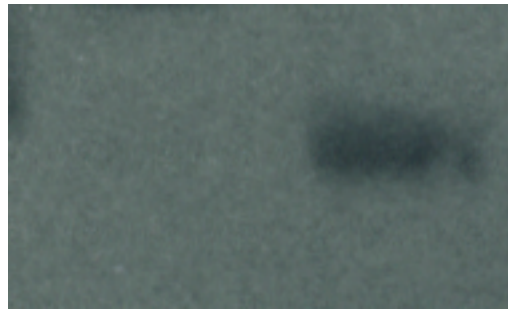

**p53**

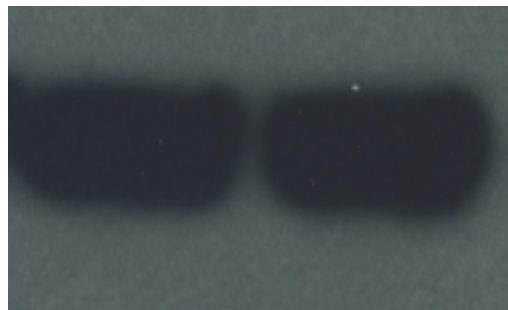

**Actin**

Supplement: NIHMS333949-supplement-02.pdf [file NIHMS333949-supplement-02.pdf]

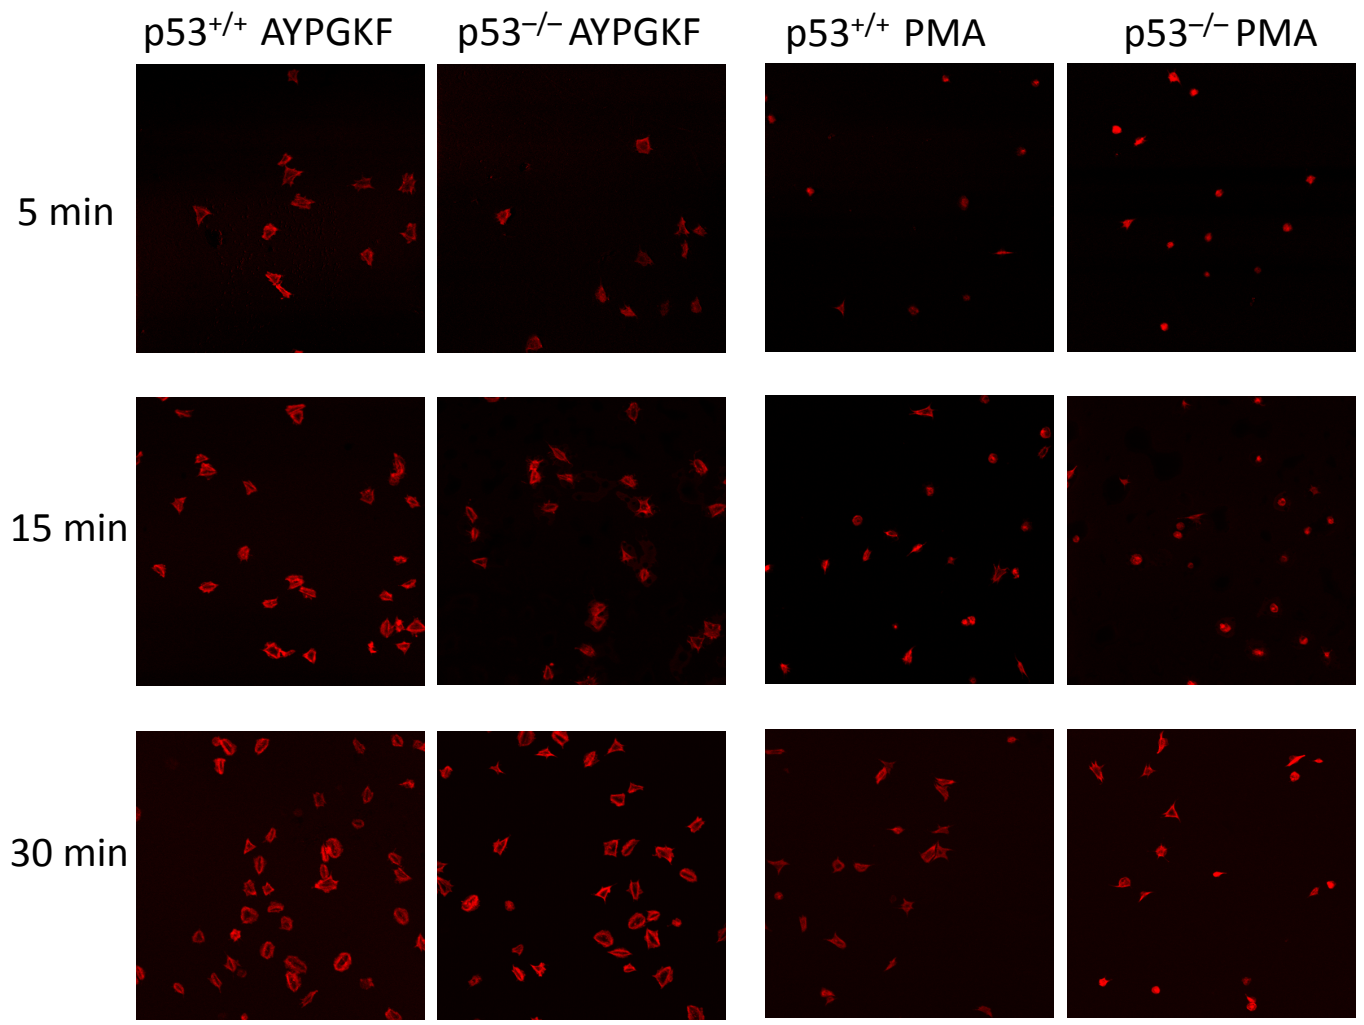

Supplement: NIHMS333949-supplement-03.pdf [file NIHMS333949-supplement-03.pdf]
